# Supplementary material
Source: PubMed Central journal article supplement (PMC5477653)
Supplement: NIHMS861211-supplement-Supplemental.pdf [file NIHMS861211-supplement-Supplemental.pdf]

# THE LANCET Oncology

## Supplementary appendix

This appendix formed part of the original submission and has been peer reviewed. We post it as supplied by the authors.

Supplement to: Luen SJ, Salgado R, Fox S, et al. Tumour-infiltrating lymphocytes in advanced HER2-positive breast cancer treated with pertuzumab or placebo in addition to trastuzumab and docetaxel: a retrospective analysis of the CLEOPATRA study. *Lancet Oncol* 2016; published online Dec 7. [http://dx.doi.org/10.1016/S1470-2045\(16\)30631-3](http://dx.doi.org/10.1016/S1470-2045(16)30631-3).

## Supplementary appendix

**Table S1. Proportions of primary versus metastatic tissue biopsies in fresh and archival specimens.**

|            | Fresh     | Archival  | Chi squared test <i>P</i> value |
|------------|-----------|-----------|---------------------------------|
| Primary    | 144 (93%) | 485 (93%) | 0.96                            |
| Metastasis | 11 (7%)   | 34 (7%)   |                                 |

**Table S2. Proportions of primary versus metastatic tissue biopsies and fresh and archival tissue specimens by ethnicity.**

|            | White     | Asian     | Black    | Chi squared test <i>P</i> value - asian vs white |
|------------|-----------|-----------|----------|--------------------------------------------------|
| Primary    | 361 (92%) | 217 (94%) | 21 (88%) | 0.43                                             |
| Metastasis | 30 (8%)   | 13 (6%)   | 3 (13%)  |                                                  |
| Fresh      | 86 (22%)  | 62 (27%)  | 2 (8%)   | 0.22                                             |
| Archival   | 301 (78%) | 168 (73%) | 22 (92%) |                                                  |

**Table S3. Proportions of fresh versus archival tissue biopsies and ER positive versus ER negative by *PIK3CA* genotype.**

|             | <i>PIK3CA</i> mutated | <i>PIK3CA</i> wild type | Chi squared test <i>P</i> value |
|-------------|-----------------------|-------------------------|---------------------------------|
| Fresh       | 35 (24%)              | 88 (28%)                | 0.46                            |
| Archival    | 111 (76%)             | 229 (72%)               |                                 |
| ER positive | 71 (48%)              | 161 (51%)               | 0.67                            |
| ER negative | 74 (50%)              | 155 (49%)               |                                 |

Figure S1. Log relative hazard for death versus stromal TIL level

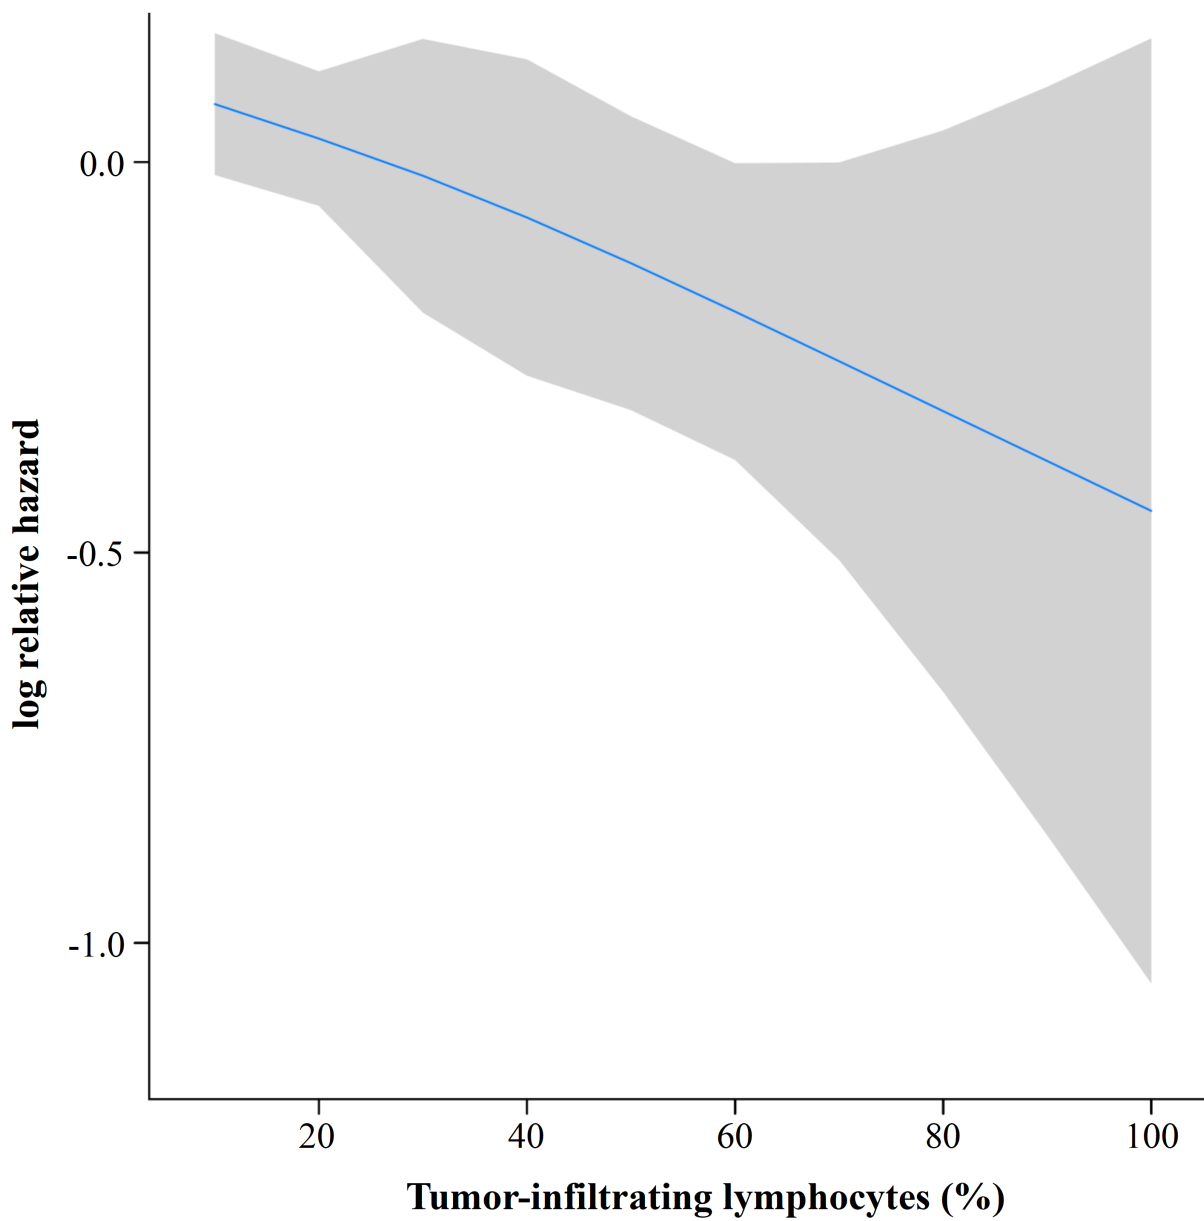

Plot demonstrating log-relative hazard for death (5 year overall survival) versus stromal TIL level (by 10% increment) after fitting a cubic smoothing spline, to determine if stromal TIL levels as a continuous measure are linearly related to prognosis.

**Figure S4. Progression-free survival by median stromal TILs cut-off and treatment arm**

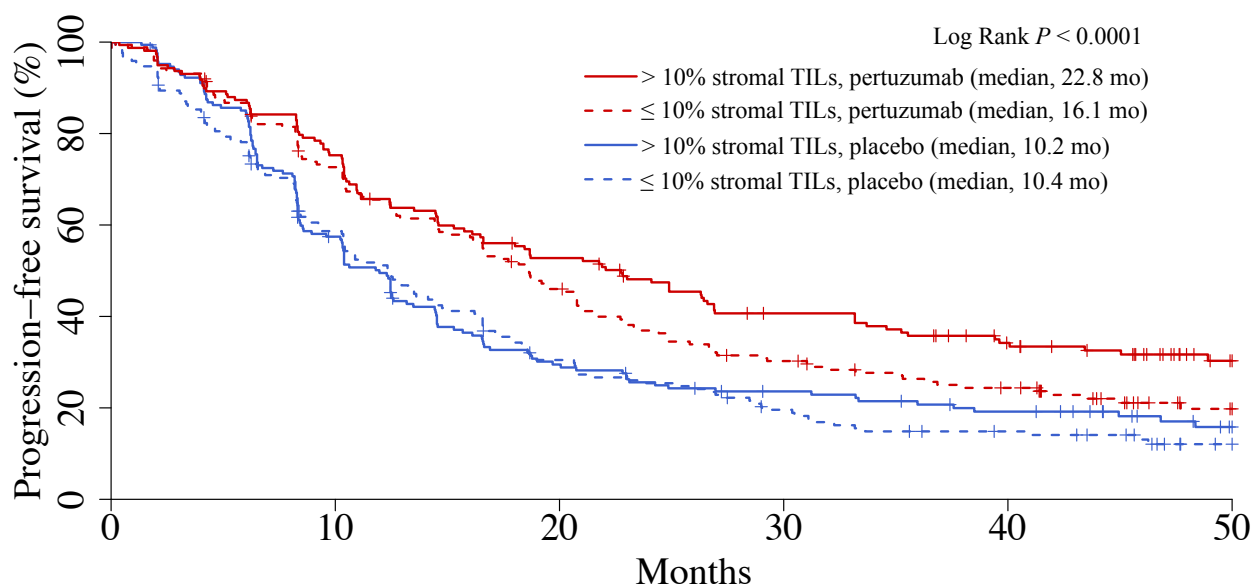

**No. at risk (censored)**

|                        |         |         |         |         |         |         |
|------------------------|---------|---------|---------|---------|---------|---------|
| > 10% TILs, pertuzumab | 159 (0) | 118 (2) | 81 (4)  | 58 (9)  | 43 (15) | 20 (34) |
| ≤ 10% TILs, pertuzumab | 177 (0) | 123 (7) | 77 (8)  | 49 (10) | 36 (14) | 14 (31) |
| > 10% TILs, placebo    | 168 (0) | 94 (3)  | 46 (6)  | 33 (10) | 25 (12) | 11 (23) |
| ≤ 10% TILs, placebo    | 174 (0) | 94 (11) | 48 (12) | 29 (14) | 19 (17) | 6 (27)  |

Survival analysis showing Kaplan-Meier estimates for progression-free survival using the treatment arm and median stromal TIL level as a cut-off value for illustration. All analyses were performed in the intention-to-treat population of the TILs-evaluable cohort. The tick marks indicate censoring events. Abbreviations: TIL, tumour-infiltrating lymphocytes; mo, months.

**Figure S5. Overall survival by median stromal TIL TILs cut-off and treatment arm**

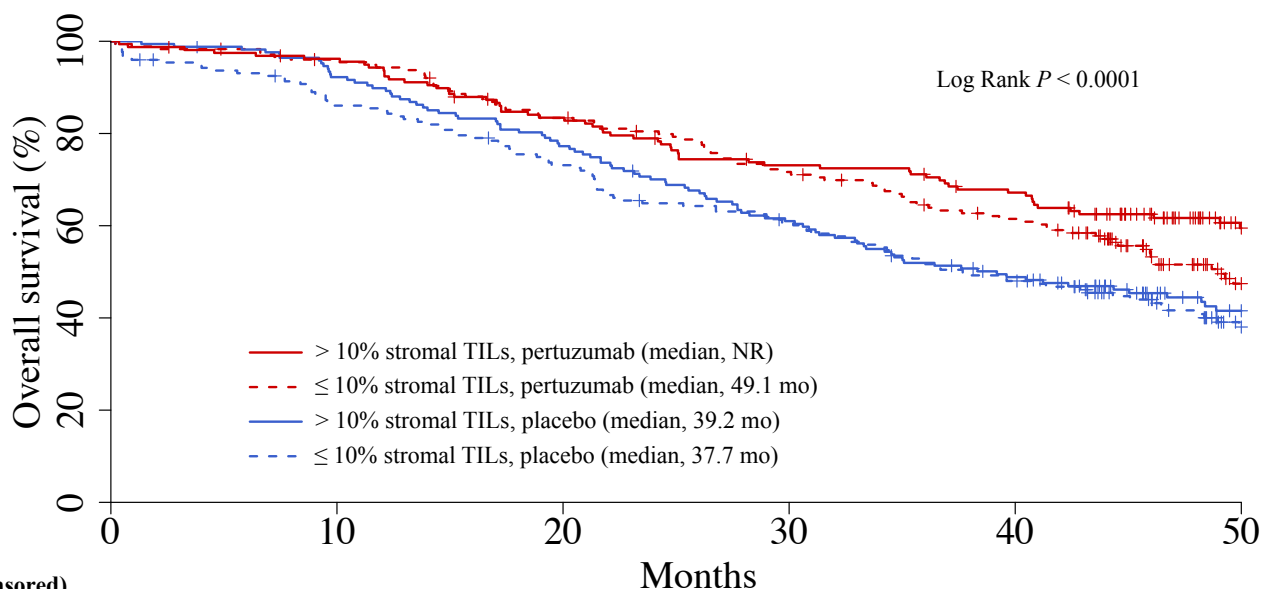

**No. at risk (censored)**

|                        |         |         |         |         |          |         |
|------------------------|---------|---------|---------|---------|----------|---------|
| > 10% TILs, pertuzumab | 159 (0) | 151 (2) | 130 (3) | 112 (5) | 101 (7)  | 52 (46) |
| ≤ 10% TILs, pertuzumab | 177 (0) | 167 (2) | 144 (4) | 122 (6) | 101 (10) | 42 (51) |
| > 10% TILs, placebo    | 168 (0) | 154 (1) | 129 (1) | 101 (2) | 78 (5)   | 42 (32) |
| ≤ 10% TILs, placebo    | 174 (0) | 147 (3) | 124 (4) | 101 (6) | 79 (7)   | 36 (37) |

Survival analysis showing Kaplan-Meier estimates for overall survival using the treatment arm and median stromal TIL level as a cut-off value for illustration. All analyses were performed in the intention-to-treat population of the TILs-evaluable cohort. The tick marks indicate censoring events. Abbreviations: TIL, tumour-infiltrating lymphocytes; mo, months; NR, not reached.

**Figure S6. Progression-free survival by stromal TIL quartiles**

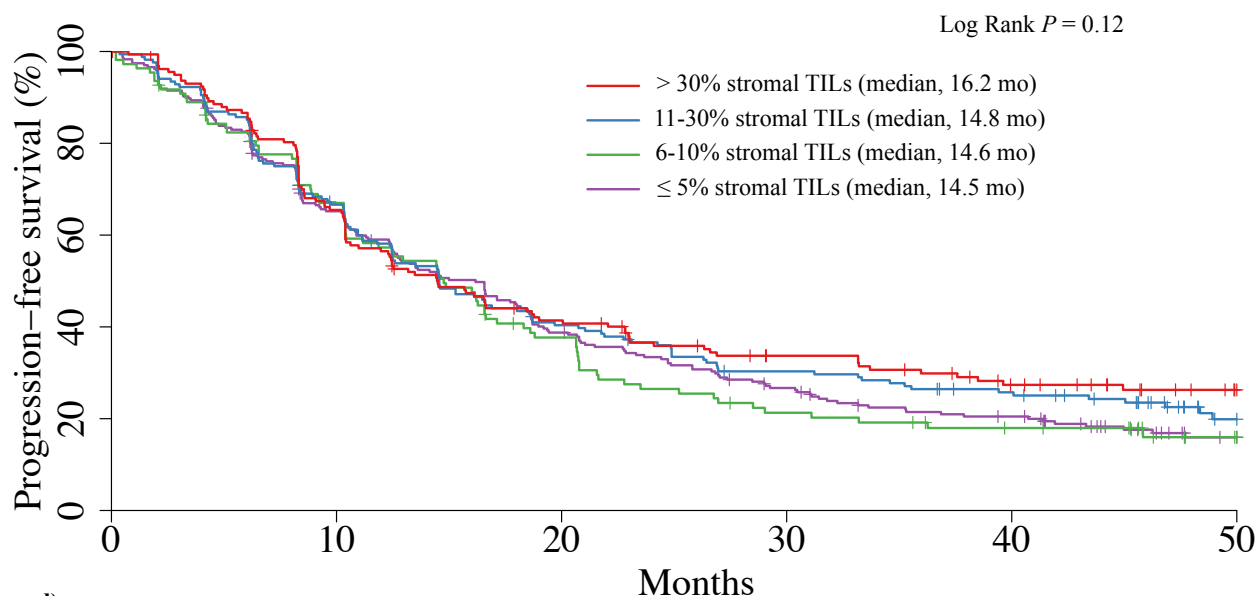

**No. at risk (censored)**

|                 | 0       | 10      | 20      | 30      | 40      | 50      |
|-----------------|---------|---------|---------|---------|---------|---------|
| Fourth quartile | 159 (0) | 102 (3) | 62 (6)  | 44 (13) | 31 (18) | 17 (31) |
| Third quartile  | 168 (0) | 110 (2) | 65 (4)  | 47 (6)  | 37 (9)  | 14 (26) |
| Second quartile | 113 (0) | 69 (9)  | 37 (11) | 20 (12) | 14 (15) | 5 (23)  |
| First quartile  | 238 (0) | 148 (9) | 88 (9)  | 58 (12) | 41 (16) | 15 (35) |

Survival analysis showing Kaplan-Meier estimates for progression-free survival using stromal TIL population quartiles as cut-off values for illustration. All analyses were performed in the intention-to-treat population of the TILs-evaluable cohort. The tick marks indicate censoring events. Log Rank *P* value calculated comparing the first quartile with fourth quartile. Abbreviations: TIL, tumour-infiltrating lymphocytes; mo, months.

**Figure S7. Overall survival by stromal TIL quartiles**

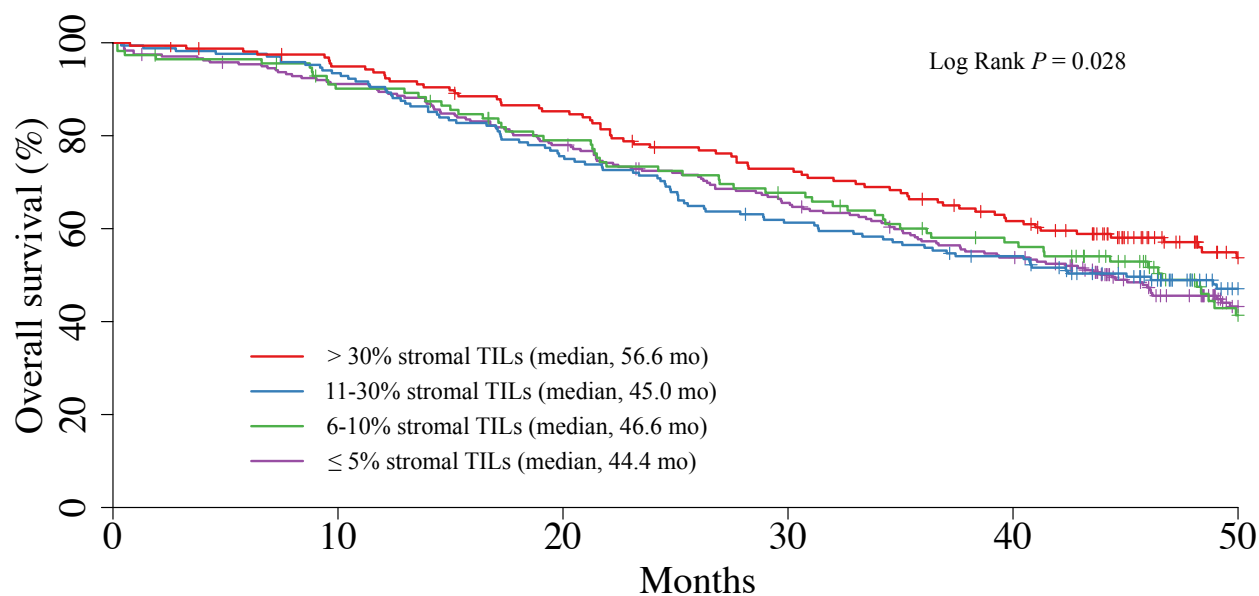

**No. at risk (censored)**

|                 | 0       | 10      | 20      | 30      | 40      | 50      |
|-----------------|---------|---------|---------|---------|---------|---------|
| Fourth quartile | 159 (0) | 148 (3) | 132 (4) | 111 (6) | 91 (9)  | 46 (45) |
| Third quartile  | 168 (0) | 157 (0) | 127 (0) | 102 (1) | 88 (3)  | 48 (33) |
| Second quartile | 113 (0) | 99 (3)  | 84 (6)  | 71 (7)  | 57 (10) | 27 (28) |
| First quartile  | 238 (0) | 215 (2) | 184 (2) | 152 (5) | 123 (7) | 51 (60) |

Survival analysis showing Kaplan-Meier estimates for overall survival using stromal TIL population quartiles as cut-off values for illustration. All analyses were performed in the intention-to-treat population of the TILs-evaluable cohort. The tick marks indicate censoring events. Log Rank *P* value calculated comparing the first quartile with fourth quartile. Abbreviations: TIL, tumour-infiltrating lymphocytes; mo, months.

Figure S8. Subgroup analysis for overall survival

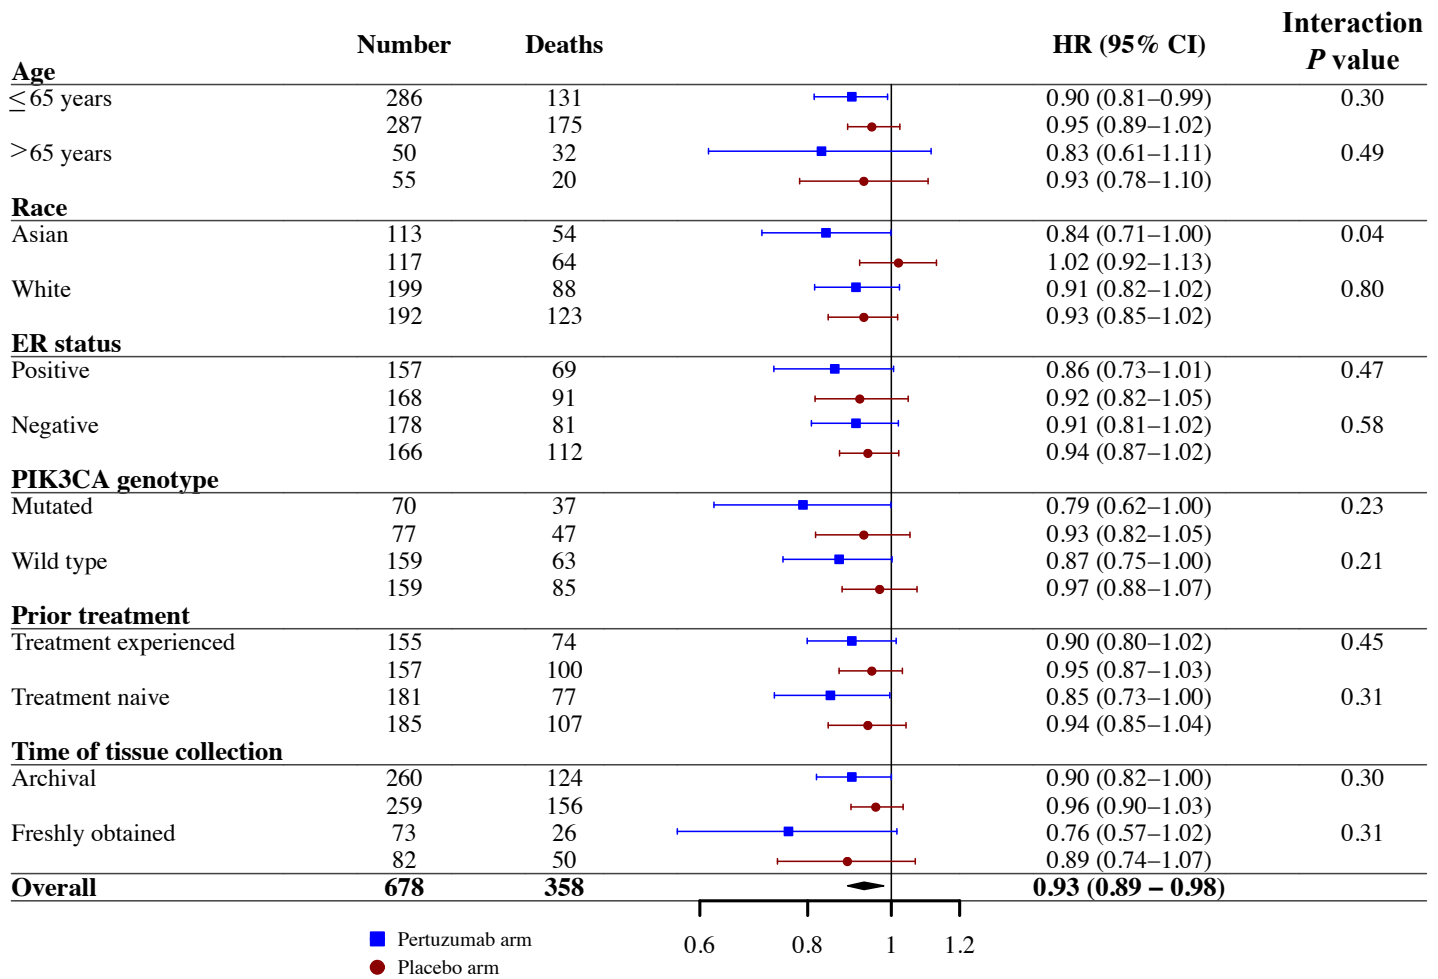

Subgroup analysis showing hazard ratios (per 10% stromal tumour-infiltrating lymphocyte increment) and 95% confidence intervals for overall survival by specified subgroups and stratified by treatment arm. Treatment interaction for each subgroup is shown. Treatment naive is defined as no prior treatment with chemotherapy or trastuzumab (endocrine therapy was allowed), and treatment experienced is defined as prior (neo)adjuvant chemotherapy and/or trastuzumab as described in the methods section. Definitions for freshly obtained tissue and archival tissue are described in the methods section. Abbreviations: HR, hazard ratio; 95% CI, 95% confidence intervals; ER, estrogen receptor.
